# Supplementary material
Source: publisher figshare collection journal article supplement (https://acs.figshare.com/ndownloader/files/4544731)

# **Partitioning of Poly(amidoamine) Dendrimers between n-Octanol and Water**

## **Supporting Information**

*Environmental Science and Technology*

ES9003747

Jyotsnendu Giri<sup>1</sup>, Mamadou S. Diallo\*<sup>1</sup>, William A. Goddard III<sup>1</sup>, Nathan Dalleska<sup>2</sup>,

Xiangdong Fang<sup>3</sup> and Yongchun Tang<sup>3</sup>

<sup>1</sup>Materials and Process Simulation Center

Division of Chemistry and Chemical Engineering

California Institute of Technology, Pasadena, CA

<sup>2</sup>Environmental Science and Engineering

Division of Engineering and Applied Science

California Institute of Technology, Pasadena, CA

<sup>3</sup>Power, Environmental and Energy Research Center

Division of Chemistry and Chemical Engineering

California Institute of Technology, Pasadena, CA

\*Corresponding Author:

Beckman Institute MC 139-74

California Institute of Technology, Pasadena, CA, 91125

Phone: 626 395 2730

Fax: 626 585 0918

**Table S1: Selected Physicochemical Properties of the Gx-NH<sub>2</sub> PAMAM Dendrimers Evaluated in This Study**

| Generation | <sup>a</sup> N <sub>Terminal</sub> | <sup>b</sup> M <sub>wth</sub> (Da) | <sup>c</sup> R <sub>H</sub> (nm) |
|------------|------------------------------------|------------------------------------|----------------------------------|
| G0         | 4                                  | 517                                | 0.96                             |
| G1         | 8                                  | 1430                               | 1.18                             |
| G2         | 16                                 | 3256                               | 1.47                             |
| G3         | 32                                 | 6909                               | 1.86                             |
| G4         | 64                                 | 14215                              | 2.44                             |
| G5         | 128                                | 28826                              | 3.12                             |
| G6         | 256                                | 58048                              | 3.81                             |
| G8         | 1024                               | 233383                             | 4.76                             |

<sup>a</sup>N<sub>Terminal</sub>: Number of terminal groups.

<sup>b</sup>M<sub>wth</sub>: Theoretical molar mass.

<sup>c</sup>R<sub>H</sub>: Hydrodynamic radius. Data are taken from Reference [30]

**Table S2: Selected Physicochemical Properties of the G4-X and G3.5 PAMAM Dendrimers Evaluated in This Study.**

| Generation | Terminal Group                                   | <sup>a</sup> N <sub>Terminal</sub> | <sup>b</sup> M <sub>wth</sub> (Da) |
|------------|--------------------------------------------------|------------------------------------|------------------------------------|
| 4          | <sup>c</sup> Amine                               | 64                                 | 14215                              |
| 4          | <sup>c</sup> Amidoethanol                        | 64                                 | 14277                              |
| 4          | <sup>c</sup> Succinamic acid                     | 64                                 | 20619                              |
| 3.5        | <sup>c</sup> Sodium carboxylate                  | 64                                 | 26252                              |
| 4          | <sup>c</sup> Tris(hydroxymethyl)<br>aminomethane | 64                                 | 18121                              |
| 4          | <sup>c</sup> Pyrrolidinone                       | 64                                 | 22285                              |
| 4          | <sup>d</sup> Amidoethylethanolamine              | 64                                 | 34492                              |

<sup>a</sup>N<sub>Terminal</sub>: Number of terminal groups.

<sup>b</sup>M<sub>wth</sub>: Theoretical molar mass.

<sup>c</sup>Ethylenediamine core.

<sup>d</sup>Diaminobutane core.

**Table S3: Selected Physicochemical Properties of the G4-NH<sub>2</sub> PAMAM Dendrimers Evaluated in This Study.**

| <sup>a</sup> Core | Terminal Group | <sup>b</sup> N <sub>Terminal</sub> | <sup>c</sup> M <sub>wth</sub> (Da) |
|-------------------|----------------|------------------------------------|------------------------------------|
| EDA               | Amine          | 64                                 | 14215                              |
| DAB               | Amine          | 64                                 | 14277                              |
| DAH               | Amine          | 64                                 | 20619                              |
| DAD               | Amine          | 64                                 | 26252                              |
| Cyst              | Amine          | 64                                 | 18121                              |

<sup>a</sup>EDA (Ethylene diamine); DAB (Diaminobutane); DAH (Diaminohexane); DAD (Diaminododecane) and Cyst (Cystamine).

<sup>b</sup>N<sub>Terminal</sub>: Number of terminal groups.

<sup>c</sup>M<sub>wth</sub>: Theoretical molar mass.

**Figure S1: Experimental setup (slow stirring method) used to measure the logK<sub>ow</sub> of PAMAM dendrimers.**

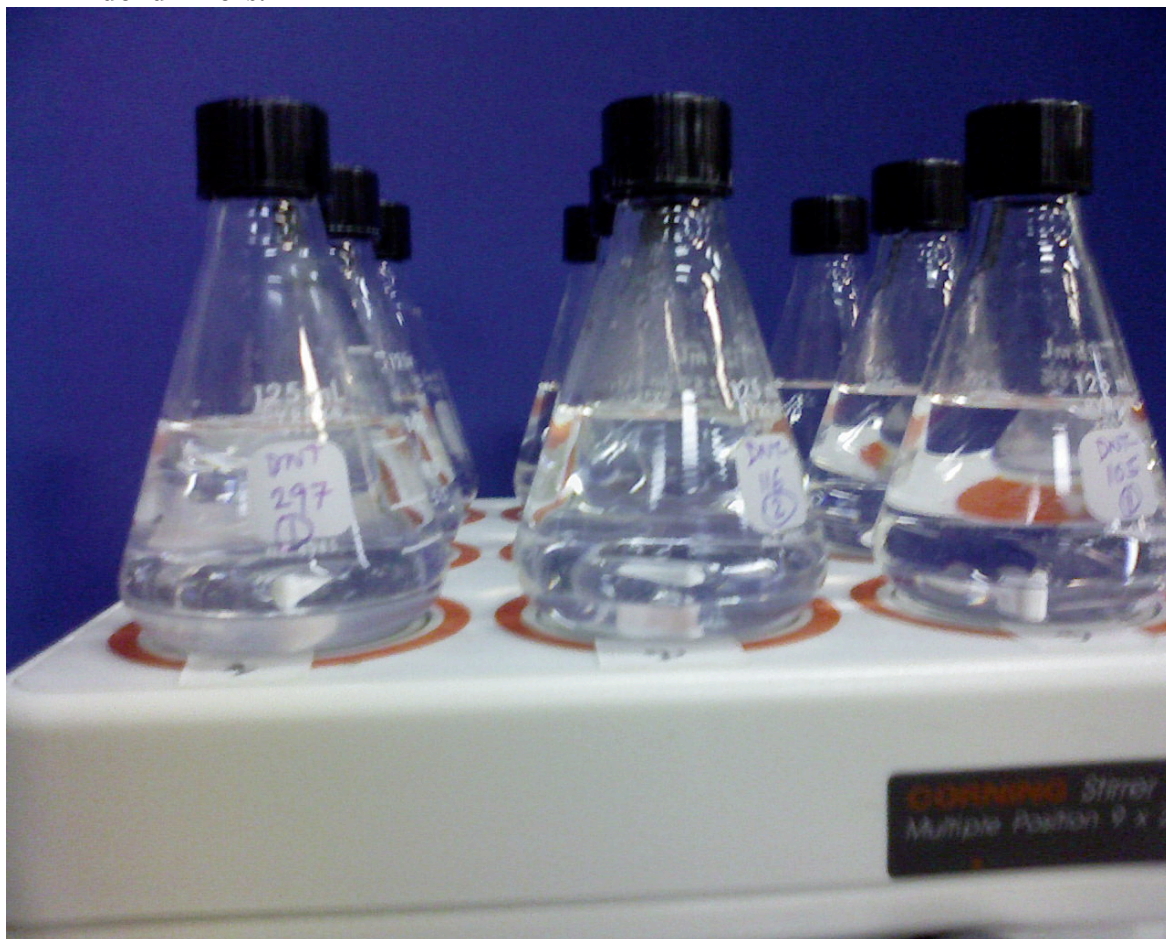

**Figure S2:** Typical chromatograms of G<sub>x</sub>-NH<sub>2</sub> PAMAM dendrimers with ethylene diamine (EDA) core when injected separately. The injection volume is 25  $\mu$ l. The solvent flow rate is 2 mL/min with a gradient of 0-50% ACN (balance water) and UV detection at 210 nm.

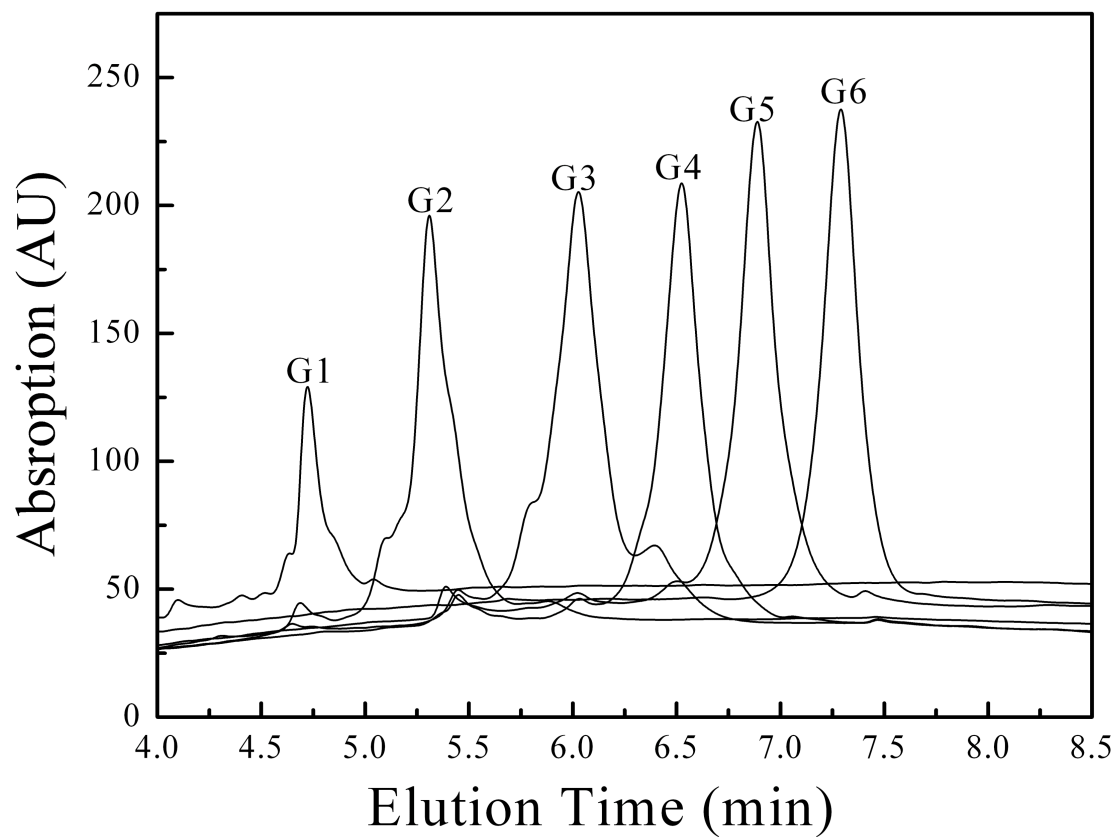

**Figure S3:** Typical chromatograms of G4 PAMAM dendrimers with ethylene diamine core and different terminal groups when injected separately. a) Tris(hydroxymethyl) aminomethane, b) sodium carboxylate, c) amine, d) succinamic acid, e) amidoethylethanolamine and f) carbomethoxypyrrolidinone. The injection volume is 25  $\mu$ L. The solvent flow rate is 2 mL/min with the gradient of 0-50% ACN (balance water) within 15 min. The UV wavelength used for detection is 210 nm.

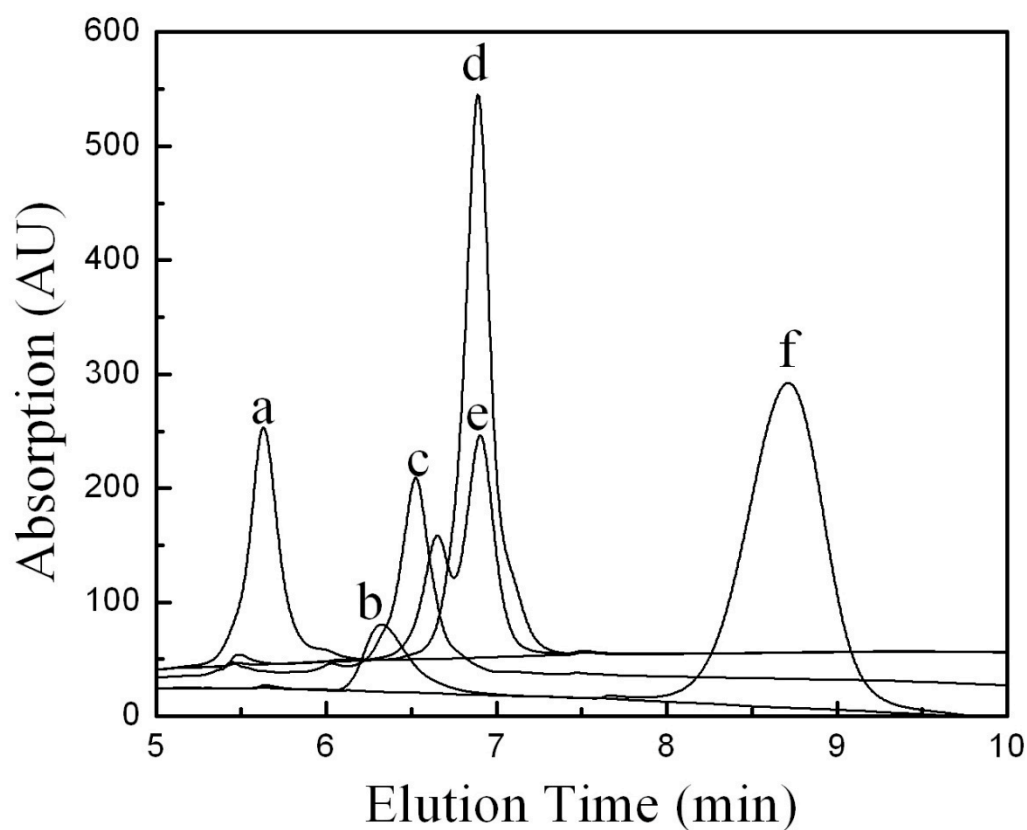

**Figures S4:** Typical chromatograms [with INSET calibration curve] used to estimate the  $\log K_{ow}$  as illustrated on a G4 PAMAM dendrimer with succinamic acid terminal groups: a) dendrimer peak corresponding to an initial aqueous phase concentration of 36  $\mu\text{M}$ , b) dendrimer peak after equilibrium partitioning between the water and octanol phases, c) standard solution of concentration 30  $\mu\text{M}$ , d) standard solution of concentration 25  $\mu\text{M}$ , e) standard solution of concentration 20  $\mu\text{M}$ , f) standard solution of concentration 10  $\mu\text{M}$ . The injection volume is 25  $\mu\text{L}$ . The solvent flow rate is 2 mL/min with a gradient of 0-50% ACN (balance water) and UV detection at 210 nm.

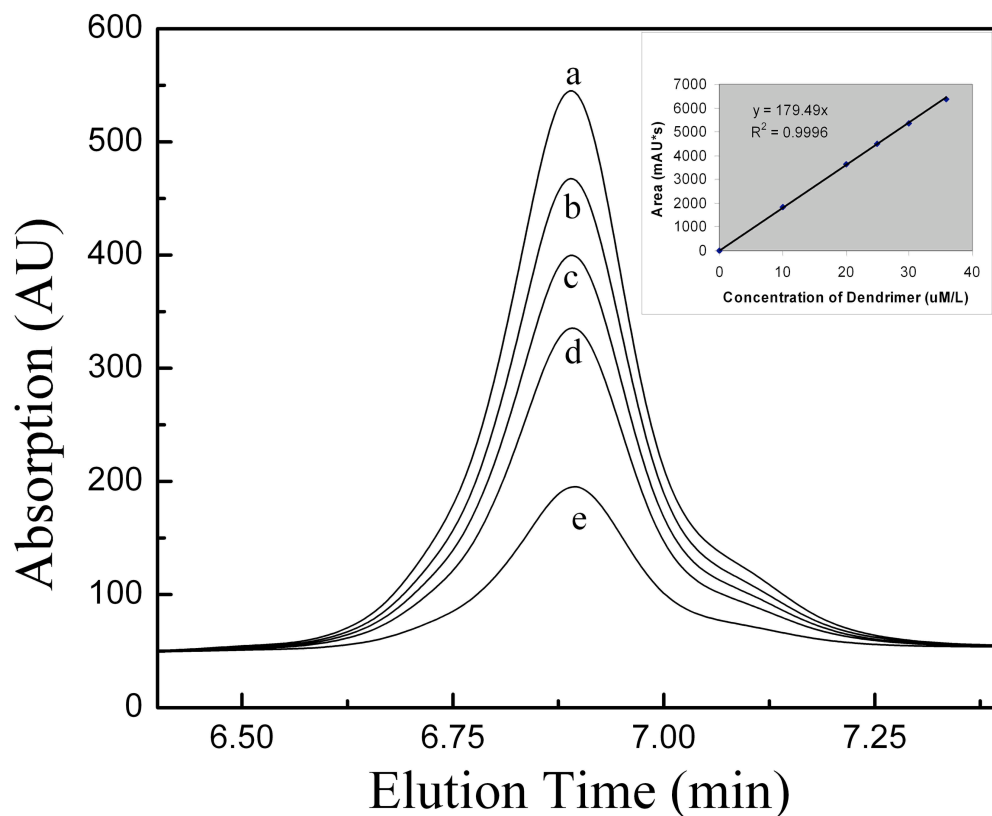



**Figure S5:** Typical chromatograms of G4 PAMAM dendrimer with succinamic acid terminal groups: a) dendrimer peak corresponding to an initial aqueous phase concentration of  $33.72\ \mu\text{M}$  with integrated areas under the peak  $6051 \pm 6$  (counts), b) dendrimer peak after equilibrium partitioning between the water and octanol phases corresponds to dendrimer concentration  $33.34\ \mu\text{M}$  with integrated areas under the peak  $5985 \pm 2$  (counts). The injection volume is  $25\ \mu\text{l}$ . The solvent flow rate is  $2\ \text{mL/min}$  with a gradient of 0-50% ACN (balance water) and UV detection at  $210\ \text{nm}$ .

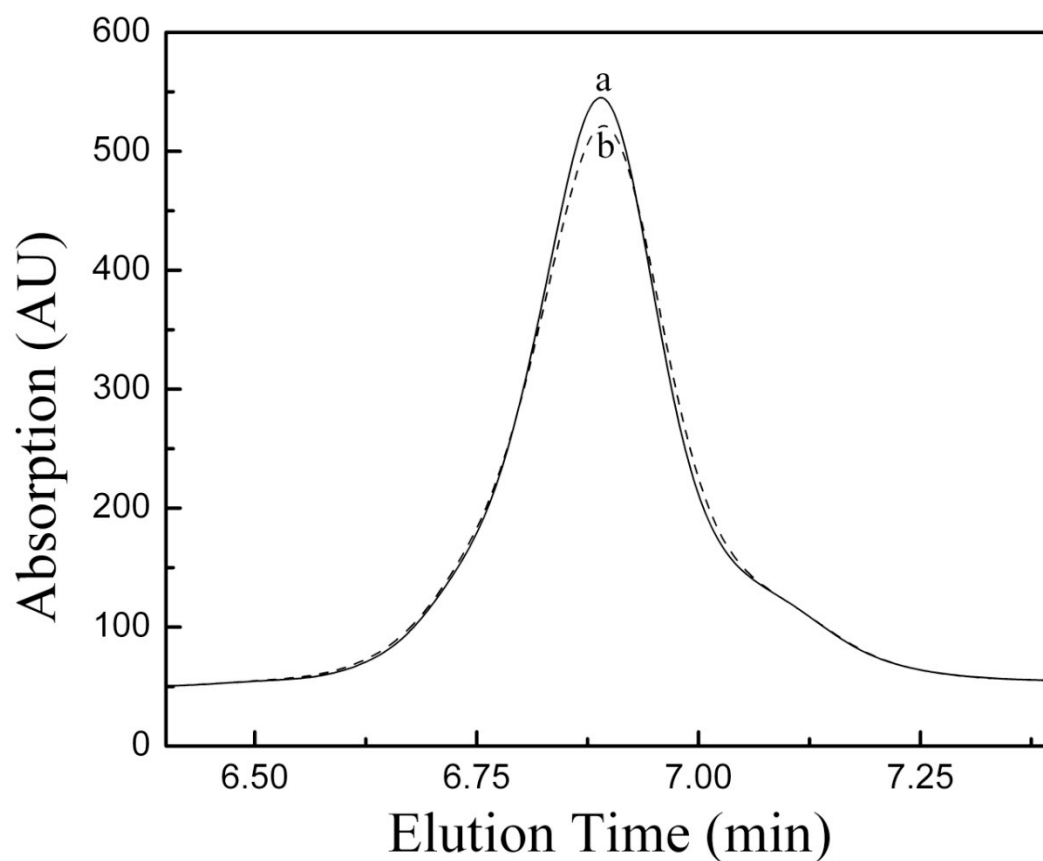

**Figure S6: Partitioning of G6-NH<sub>2</sub> PAMAM dendrimer with ethylene diamine core at the octanol-water (O/W) interface. Note that the cloudiness at the O/W interface.**

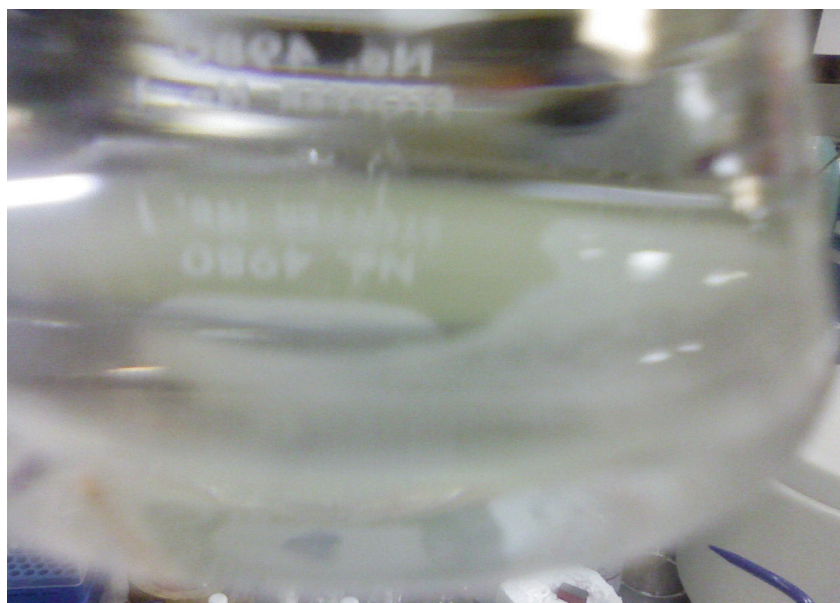

Supplement: Supplementary file 1 [file 4544731]
